# Supplementary material
Source: publisher site journal article supplement (https://www.dovepress.com/article/310535)
Supplement: Supplementary file 1 [file get_supplementary_file.php]

**
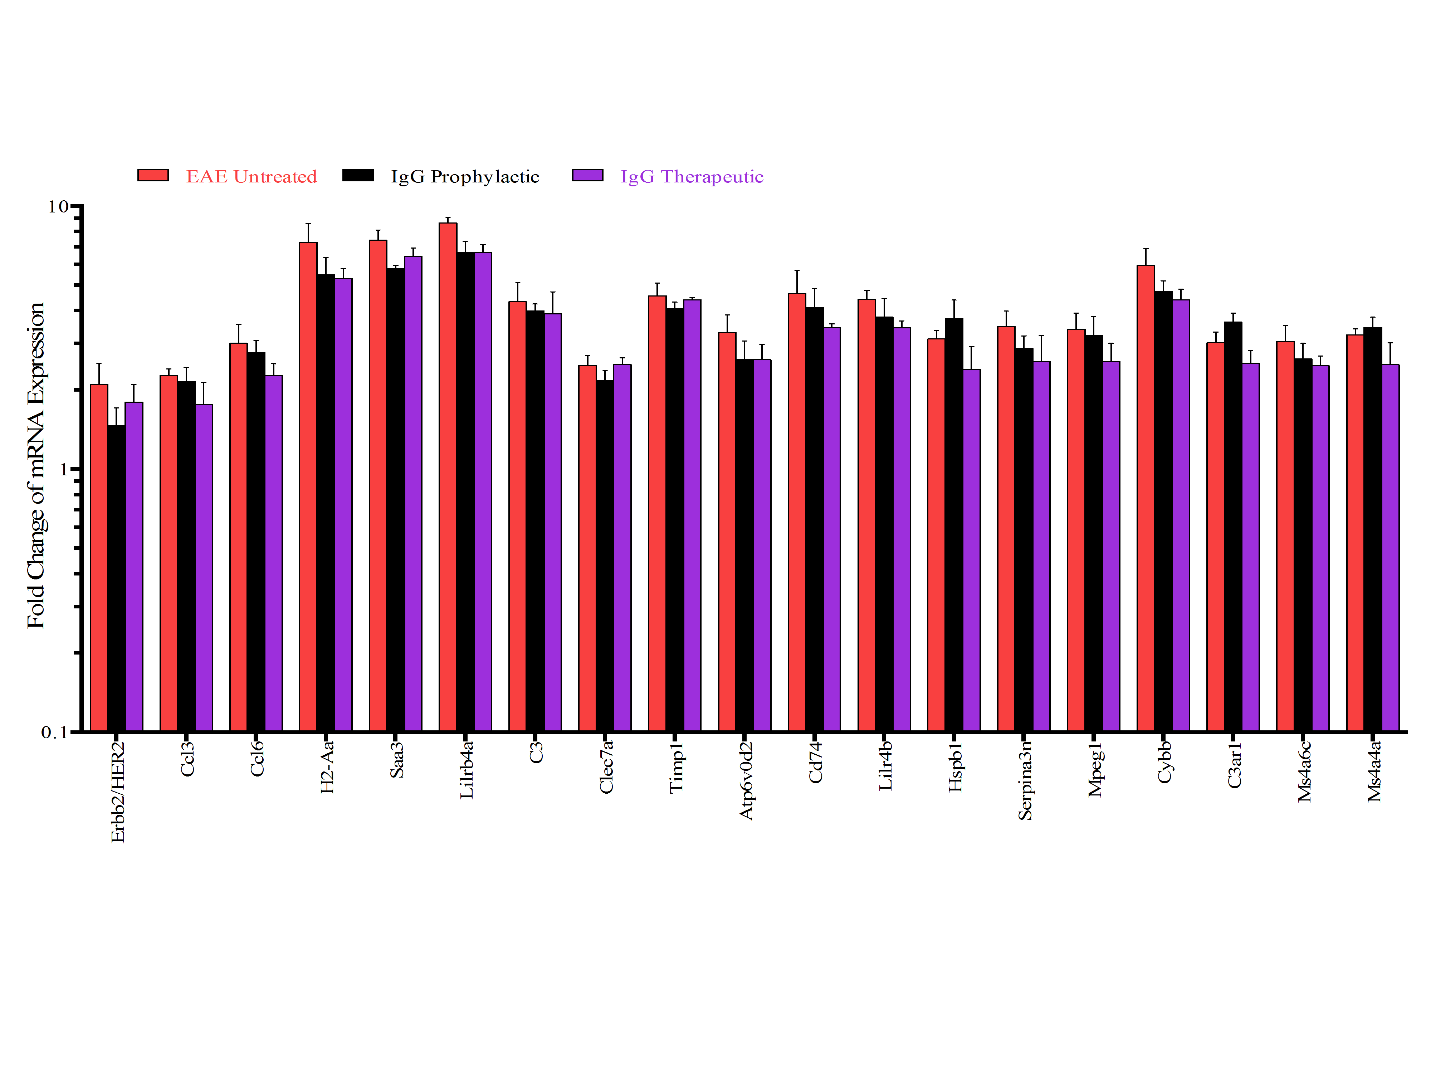
**

**Supplementary Figure S1**. Brain-extracted mRNA expression of various genes in IgG-treated EAE mice. The detected genes were validated using qRT-PCR between EAE untreated mice, IgG used in a prophylactic or therapeutic regimen at HCS.
